# Supplementary material for: Influence of electronic correlation on the valley and topological properties of VSiGeP4 monolayer
Source: Royal Society of Chemistry journal article supplement (doi:10.1039/d3cp04739c), 2024-01-01
Supplement: d3cp04739c1.pdf [file d3cp04739c1.pdf]

### Supplementary Information

Influence of electronic correlation on valley and topological properties in VSiGeP<sub>4</sub> monolayer

Guangxin Fan<sup>a</sup>, Yanzhao Wu<sup>a</sup>, Junwei Tong<sup>b</sup>, Li Deng<sup>a</sup>, Xiang Yin<sup>a</sup>, Xiaoli Han<sup>c</sup>, Fubo Tian<sup>d</sup>, and Xianmin Zhang<sup>a\*</sup>

<sup>a</sup>Key Laboratory for Anisotropy and Texture of Materials (Ministry of Education), School of Material Science and Engineering, Northeastern University, Shenyang, 110819, China

<sup>b</sup>Department of Physics, Freie Universität Berlin, Berlin, 14195, Germany

<sup>c</sup>Taian Weiye Electromechanical Technology Co., Ltd, Taian, 271000, China

<sup>d</sup>State Key Laboratory of Superhard Materials, College of Physics, Jilin University, Changchun, 130012, China

\*E-mail: zhangxm@atm.neu.edu.cn

As shown in Fig. S1(a), for VSiGeP<sub>4</sub> monolayer at  $U = 0.00$  eV, the projected density of states (PDOS) for V, P1, and P2 atoms overlap during  $-1.80$  to  $0.00$  eV, which means the V atom is bonded with adjacent P atoms. Similarly, the Si and P1/P3 atoms and Ge and P2/P4 atoms also overlap at  $-1.80$  to  $0.00$  eV, which indicates the Si and Ge atoms are bonded with the P1/P3 and P2/P4 atoms, respectively. This bonding characteristic is further demonstrated by calculating the Projected crystal orbital Hamilton population (pCOHP). As shown in Fig. S1(b), during  $-5.00$  to  $0.00$  eV, the pCOHP of 3d-V and 3p-P1/P2 orbitals are positive at  $-5.00$  to  $0.00$  eV, indicating the bonding state between V and P1/P2 atoms. The almost all positive pCOHP during  $-5.00$  to  $0.00$  eV of 3p-Si and 3p-P1/P3 orbitals and 4p-Ge and 3p-P2/P4 orbitals also indicates the bonding state between Si and P1/P3 and Ge and P2/P4 atoms. As shown in Fig. S1(c), during this bonding progress, the V, Si, and Ge atoms lose electrons, while the P atoms accept electrons. Similarly, for VSiGeP<sub>4</sub> monolayer at  $U = 3.00$  eV, all V, Si, and Ge atoms also bonded with the adjacent P atoms. During this combining progress, the electrons are transformed from V, Si, and Ge atoms to P atoms because the P atoms have larger electronegativity than V, Si, and Ge atoms.

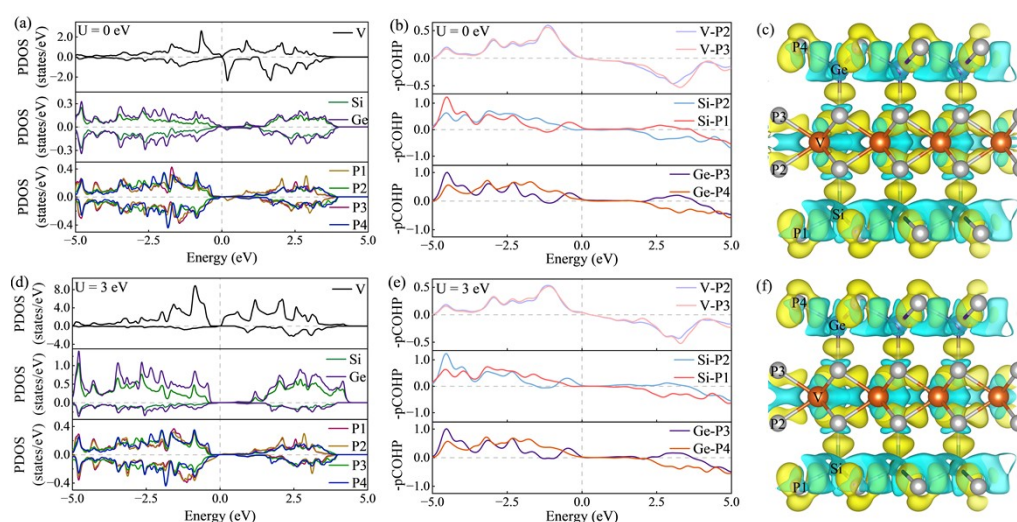

**Fig. S1.** (a) Projected density of states (PDOS) for V, Si, Ge, and P atoms in VSiGeP<sub>4</sub> monolayer at  $U = 0.00$  eV. (b) Projected crystal orbital Hamilton population (pCOHP) of V-3d and P1/P2-3p orbitals, Si-3p and P1-3p orbitals, Ge-4p and P-3p orbitals for VSiGeP<sub>4</sub> monolayer at  $U = 0.00$  eV. (c) Charge density difference of VSiGeP<sub>4</sub> monolayer at  $U = 0.00$  eV. (d) Projected density of states (PDOS) for V, Si, Ge, and P atoms in VSiGeP<sub>4</sub> monolayer at  $U = 3.00$  eV. (e) Projected crystal orbital Hamilton

population (pCOHP) of V-3d and P1/P2-3p orbitals, Si-3p and P1-3p orbitals, Ge-4p and P-3p orbitals for VSiGeP<sub>4</sub> monolayer at U = 3.00 eV. (f) Charge density difference of VSiGeP<sub>4</sub> monolayer at U = 3.00 eV.

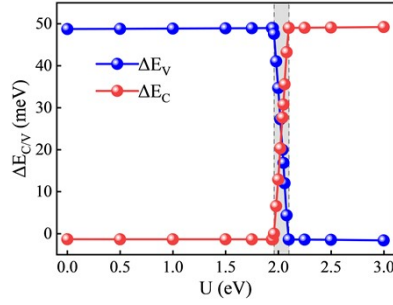

**Fig. S2.** The  $\Delta E_C$  (red line) and  $\Delta E_V$  (blue line) of VSiGeP<sub>4</sub> monolayer at different U values.

Fig. S2 shows the energy difference between K and K' points of VSiGeP<sub>4</sub> monolayer as a function of U value. As the U is smaller than 1.96 eV, the energy difference ( $\Delta E_V$ ) is mainly contributed by the electrons of valence band. In the range of 1.96 ~ 2.10 eV,  $\Delta E_V$  reduces sharply and  $\Delta E_C$  rapidly increases. When the U exceeds 2.10 eV,  $\Delta E_C$  is dominant by the electrons of conduction band.  $\Delta E_V$  and  $\Delta E_C$  correspond to the valence and conduction bands, respectively.

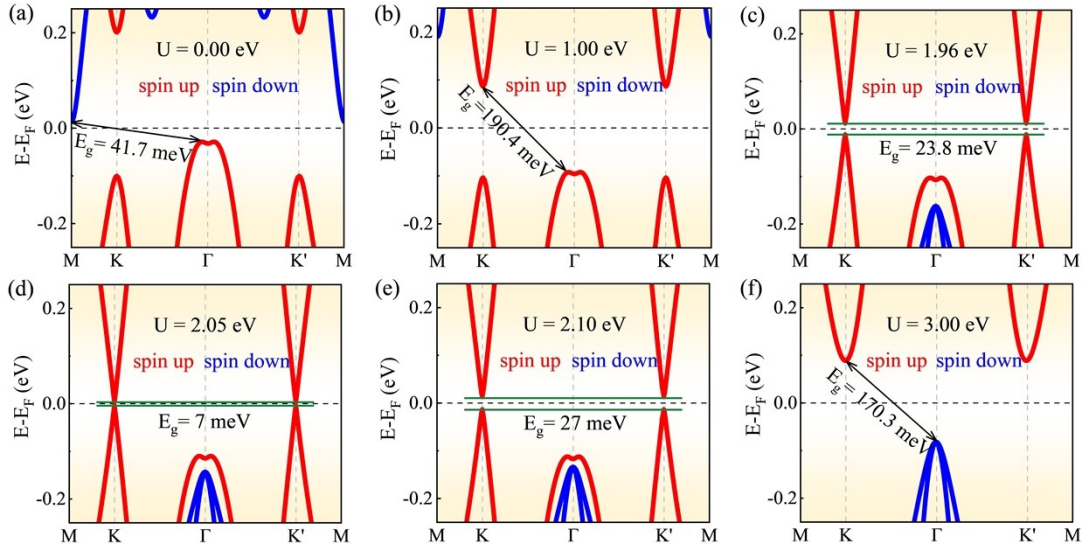

**Fig. S3.** Spin-resolved energy band structures without considering SOC effect for VSiGeP<sub>4</sub> monolayer at different U values.

Fig. S3 shows the spin-resolved band structures of VSiGeP<sub>4</sub> monolayer at different U values without considering SOC effect. When the U is set to 0 eV, VSiGeP<sub>4</sub> monolayer behaves as an indirect band gap BMS with a band gap of 41.7 meV, as shown in Fig. S3(a). As the U = 1.00 eV, VSiGeP<sub>4</sub> monolayer keeps the semiconductor characteristic with a band gap of 109.4 meV, as shown in Fig. S3(b). As U set to 1.96, 2.05, and 2.10 eV, VSiGeP<sub>4</sub> monolayer becomes a direct band gap semiconductor with a band gap of 23.8, 7.0, and 27.0 meV, respectively, as shown in Fig. S3(c), S3(d), and S3(e). At U = 3.00 eV, VSiGeP<sub>4</sub> monolayer becomes the indirect band gap BMS with a band gap of 170.3 meV. Notably, due to the absence of SOC effect, the energies of K and K' points are degenerate for all the above cases.

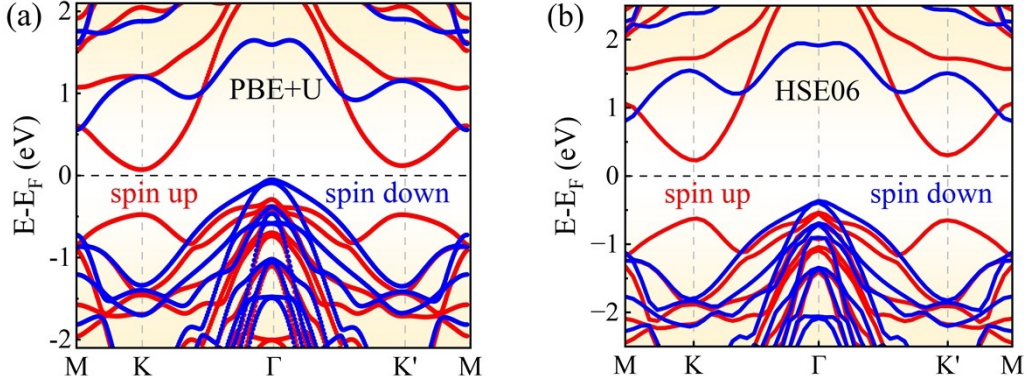

Figure S4. Spin-resolved energy band structures with (a) PBE+U ( $U = 3.0$  eV) and (b) HSE06 method.

As shown in Fig. S4, spin-resolved energy band structures of VSiGeP<sub>4</sub> monolayer are calculated by PBE+U ( $U = 3.0$  eV) and HSE06 methods. The electronic features near the Fermi level are nearly same.

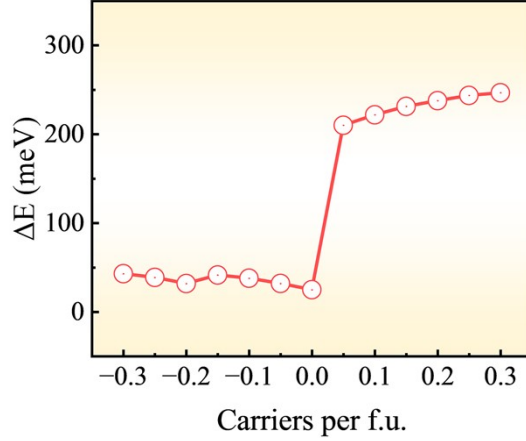

Fig. S5. The energy differences of VSiGeP<sub>4</sub> monolayer between AFM and FM ordering ( $\Delta E = E_{\text{AFM}} - E_{\text{FM}}$ ) with various doping concentrations.

With the change of doping concentration,  $\Delta E$  of VSiGeP<sub>4</sub> monolayer remains positive, showing the FM ground state for VSiGeP<sub>4</sub> monolayer, as shown in Fig. S5.

As shown in Figure S6(a), with doping 0.05 holes per f.u., the energy band of VSiGeP<sub>4</sub> monolayer from the spin-down channel at  $\Gamma$  point crosses the Fermi level, resulting in a half metal state. It means that 100% spin-down carriers will be excited at the  $\Gamma$  point, which is very important for spintronics. Similarly, VSiGeP<sub>4</sub> monolayer also presents a half metal characteristic with doping 0.10 ~ 0.20 holes per f.u., as drawn in Fig. S6(b)-S6(d). As doping concentration of holes exceeds 0.20 holes per f.u., both the energy bands of spin-up and spin-down channels cross the Fermi level, resulting in a metal state, as indicated in Fig. S6(e) and S6(f). As shown in Fig. 6(g), with doping 0.05 electrons per f.u., the energy band of VSiGeP<sub>4</sub> monolayer from the spin-up channel at K point crosses the Fermi level. In this case, 100% spin-up carriers will be excited at the K point. As doping concentration exceeds 0.05 electrons per f.u., both the energy bands of K and K' points from spin-up channel cross the Fermi level, as shown in Fig. S4(h)-S4(l).

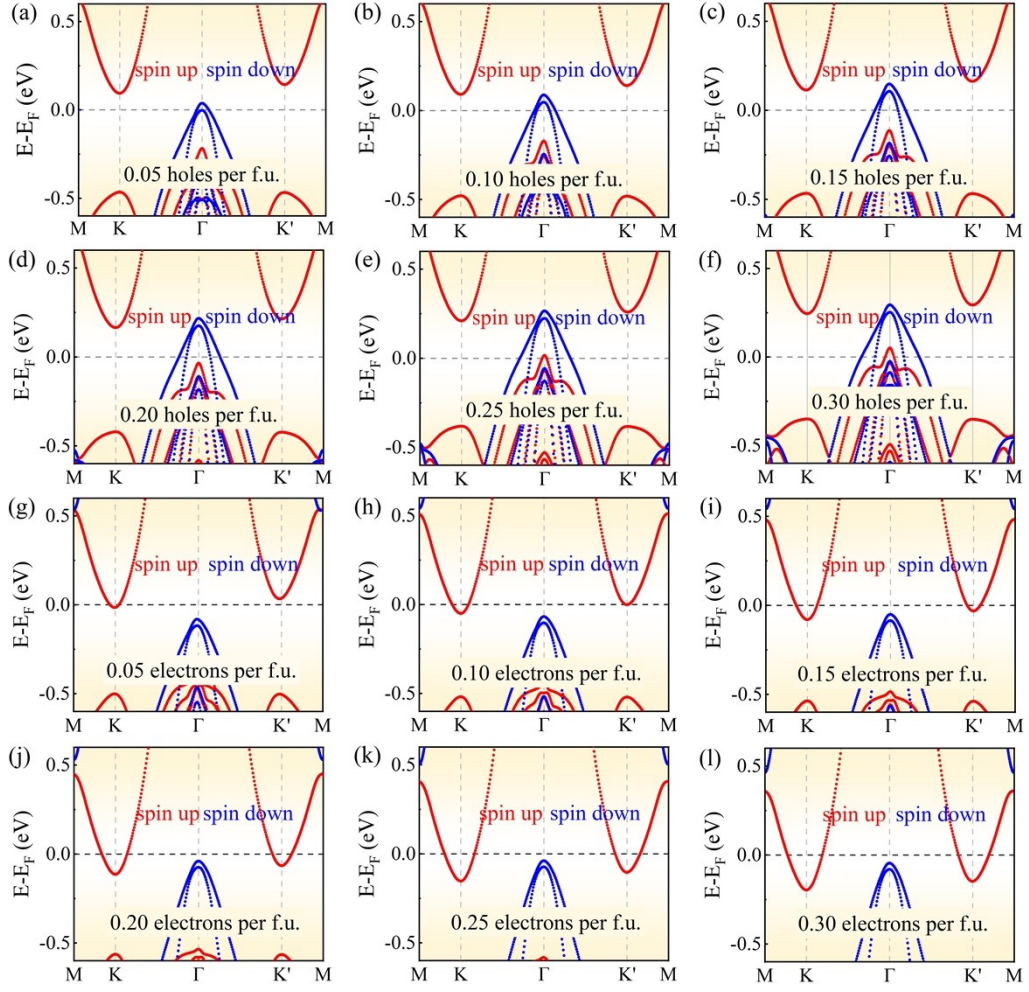

**Fig. S6.** The energy band structures of VSiGeP<sub>4</sub> monolayer with various carrier doping concentrations at  $U = 3.00$  eV.
